# **β-blockers augment L-type Ca<sup>2+</sup> channel activity by target-selective spatially restricted β<sub>2</sub>AR-cAMP-PKA signaling in neurons**

Ao Shen<sup>1,2</sup>, Dana Chen<sup>2</sup>, Manpreet Kaur<sup>2</sup>, Bing Xu<sup>2,3</sup>, Qian Shi<sup>2</sup>, Joseph M. Martinez<sup>2</sup>, Kwun-nok Mimi Man<sup>2</sup>, Johannes W. Hell<sup>2</sup>, Manuel F. Navedo<sup>2</sup>, Xi-Yong Yu<sup>1</sup>, Yang K. Xiang<sup>2,3</sup>

<sup>1</sup> Key Laboratory of Molecular Target and Clinical Pharmacology, State Key laboratory of Respiratory Disease, School of Pharmaceutical Sciences & Fifth Affiliated Hospital, Guangzhou Medical University, Guangzhou, Guangdong 511436, China

<sup>2</sup> Department of Pharmacology, University of California Davis, Davis, CA 95616, USA

<sup>3</sup> VA Northern California Health Care System, Mather, CA 95655, USA

Correspondence and requests for materials should be addressed to Y.K.X. (email: [ykxiang@ucdavis.edu](mailto:ykxiang@ucdavis.edu))

## Abstract

G protein-coupled receptors (GPCRs) transduce pleiotropic intracellular signals in mammalian cells. Here, we report that some antagonists of  $\beta$  adrenergic receptors ( $\beta$ ARs) such as  $\beta$ -blocker carvedilol and alprenolol activate  $\beta_2$ AR at nanomolar concentrations, which promote G protein signaling and cAMP/PKA activity without action of G protein receptor kinases (GRKs). The cAMP/PKA signal is restricted within the local plasma membrane domain, leading to selectively enhance PKA-dependent augment of endogenous L-type calcium channel (LTCC) activity but not AMPA receptor in hippocampal neurons. Moreover, we have engineered a mutant  $\beta_2$ AR that lacks serine 204 and 207 in the catecholamine binding pocket. This mutant can be preferentially activated by carvedilol but not the orthosteric agonist isoproterenol. Carvedilol activates the mutant  $\beta_2$ AR in hippocampal neurons augmenting LTCC activity through cAMP/PKA signaling. Together, our study identifies a mechanism by which  $\beta$ -blocker-dependent activation of GPCRs at low ligand concentrations promotes local cAMP/PKA signaling to selectively target membrane downstream effectors such as LTCC in neurons.

## Introduction

GPCRs often signal not only through canonical G proteins but also through noncanonical G protein-independent signaling, frequently via G protein receptor kinases (GRKs) and  $\beta$ -arrestins (1, 2). One of the universal features of GPCRs is that they undergo ligand-induced phosphorylation at different sites by either GRKs or second messenger dependent protein kinases such as protein kinase A (PKA). The phosphorylated GPCRs thus may present distinct structural features that favor receptor binding to different signaling partners, engaging distinct downstream signaling cascades (3-5). Some ligands can differentially activate a GPCR via a phenomenon known as functional selectivity or biased signaling (6, 7). For example, stimulation of  $\beta_2$ -adrenergic receptor ( $\beta_2$ AR), a prototypical GPCR involved in memory and learning in the central nervous system (CNS) and regulation of metabolism and cardiovascular function, promotes phosphorylation by both GRKs and PKA (8-11). We

have recently identified spatially segregated subpopulations of  $\beta_2$ AR undergoing exclusive phosphorylation by GRKs or PKA in a single cell, respectively. These findings indicate specific GPCR subpopulation-based signaling branches can co-exist in a single cell (12). GRK-mediated phosphorylation promotes pro-survival and cell growth signaling via  $\beta$ -arrestin-dependent mitogen-activated protein kinase (MAPK/ERK) pathways, prompting the search for biased ligands that preferentially activate  $\beta$ -arrestin pathways (13-18). On the other hand, our recent studies show that the cAMP/PKA-dependent phosphorylation of  $\beta_2$ AR controls ion channel activity at the plasma membrane in primary hippocampal neurons (12).

$\beta$ -blockers are thought to reduce cAMP signaling because they either reduce basal activity of  $\beta$ ARs or block agonist-induced receptor activation. While  $\beta$ -blockers are successful in clinical therapies of a broad range of diseases, their utility is limited by side effects in both the CNS and peripheral tissues (19, 20). Indeed, studies have revealed that some  $\beta$ -blockers display partial agonism and can promote receptor-Gs coupling at high concentrations *in vitro* (21-23). Accordingly, some  $\beta$ -blockers display intrinsic properties mimicking sympathetic activation (sympathomimetic  $\beta$ -blockers) (24-26). The mechanism remains poorly understood because classic cAMP assay do not show even minimal cAMP signal induced by these  $\beta$ -blockers (24, 25).

In this study, we show that the  $\beta$ -blockers carvedilol and alprenolol can promote Gs protein coupling to  $\beta_2$ AR and cAMP/PKA but not GRK activity at nanomolar concentrations. Thus these  $\beta$ -blockers are emerging as partial agonists rather than strict antagonists in mammalian cells. This cAMP/PKA signaling is spatially restricted, selectively promoting phosphorylation of  $\beta_2$ AR and  $\text{Ca}_v1.2$  by PKA which augments LTCC activity in primary hippocampal neurons. Furthermore, we have engineered a mutant  $\beta_2$ AR that can be selectively activated by carvedilol but not by the orthosteric agonist isoproterenol (ISO) to stimulate PKA but not GRK. Together, these studies identify a unique mechanism by which  $\beta$ -blockers activate  $\beta_2$ AR at low concentrations, which promotes Gs/cAMP/PKA signaling branch and selectively targets downstream

LTCC channels in neurons. This observation may also explain sympathomimetic effects of  $\beta$ -blockers in the CNS.

## Results

### **Carvedilol and alprenolol selectively promote $\beta_2$ AR-mediated PKA-phosphorylation of $\beta_2$ AR in HEK293 cells.**

In this study, we applied two sets of well-characterized phospho-specific antibodies, anti-pS261/262 and anti-pS355/356 to examine a series of  $\beta$ -blockers for their effects on the phosphorylation of  $\beta_2$ AR at its PKA and GRKs sites, respectively (12, 27, 28). We found that various  $\beta$ -blockers including alprenolol (ALP), carvedilol (CAR), propranolol (PRO) and CGP12177 (177) were able to stimulate phosphorylation of  $\beta_2$ AR at PKA sites expressed in HEK293 cells, similar to the  $\beta$ AR agonist isoproterenol (ISO) (**Fig. 1a**). In contrast, other  $\beta$ -blockers, i.e., ICI118551 (ICI), timolol (TIM) and metoprolol (MET), were not able to do so (**Fig. 1a**). The ligand-induced phosphorylation of  $\beta_2$ AR was blocked by  $\beta_2$ AR-specific antagonist ICI but not  $\beta_1$ AR-specific antagonist CGP20712A (CGP) (**Fig. 1b,c**). We chose CAR and ALP for further study. We found that CAR and ALP promoted phosphorylation of  $\beta_2$ AR by PKA even at nanomolar concentrations (**Fig. 2a,b**), which was paralleled by concentration-dependent increases in phosphorylation of ERK (**Supplemental Fig. 1**). The roles of  $\beta_2$ AR and PKA in this phenomenon were confirmed by inhibition of  $\beta_2$ AR with ICI and inhibition of PKA with H89, respectively (**Fig. 2c,d**). In contrast, those  $\beta$ -blockers induced at best minimal increases in phosphorylation of  $\beta_2$ AR at GRK sites and only at high concentrations, consistent with previous report (29) (**Fig. 1a** and **Supplemental Fig. 1,2**). As positive control, the  $\beta$ AR agonist ISO promoted robust increases in both PKA and GRK phosphorylation of the receptors at different concentrations ranging from nanomolar to micromolar (**Fig. 1,2** and **Supplemental Fig. 1,2**). In the CNS,  $\beta_2$ AR emerges as a prevalent postsynaptic norepinephrine effector at glutamatergic synapses (30-33). Consistent with the data from HEK293 cells, we found that  $\beta$ -blockers CAR and ALP activated  $\beta_2$ AR and promoted phosphorylation of the receptor by PKA in hippocampal neurons (**Fig. 4a**). Together, these data



suggest that certain  $\beta$ -blockers selectively promote PKA phosphorylation of  $\beta_2$ AR in HEK293 and primary hippocampal neurons.

### **Carvedilol and alprenolol promote Gs $\alpha$ recruitment to $\beta_2$ AR and increase locally restricted cAMP signal.**

The western blot data on PKA phosphorylation of  $\beta_2$ AR indicates a stimulation of the receptor-mediated Gs/AC/cAMP pathway by these  $\beta$ -blockers. We measured ligand-induced Gs $\alpha$  recruitment to  $\beta_2$ AR with an *in situ* proximity ligation assay (PLA), which allows direct visualization and quantification of protein-protein interactions. We showed that ISO, CAR and ALP were able to increase the PLA signals between  $\beta_2$ AR and Gs $\alpha$ , indicating recruitment of Gs $\alpha$  to  $\beta_2$ AR (**Fig. 3a**). As control, TIM had no effect on the recruitment of Gs $\alpha$  to  $\beta_2$ ARs. The role of Gs/AC in CAR-induced PKA phosphorylation of  $\beta_2$ AR was further validated by AC-specific inhibition with 2',3'-dideoxyadenosine (ddA, **Supplemental Fig. 3**). These data indicate that CAR and ALP are able to stimulate  $\beta_2$ AR-Gs signal to increase PKA phosphorylation of the receptor.

$\beta$ -blockers have been thought to generally block  $\beta_2$ AR-induced cAMP signal. We hypothesized that the cAMP signal induced by  $\beta$ -blockers is restricted to local plasma membrane domains containing activated receptor, which is not detectable with traditional cAMP assays likely due to limited sensitivity. We applied highly sensitive FRET-based biosensor ICUE3 to detect the dynamics of cAMP signal in living cells (34, 35). The full agonist ISO promoted cAMP signal in HEK293 cells while all  $\beta$ -blockers failed to do so (**Fig. 3b**), in agreement with the classic definition of  $\beta$ -blockers. However, when cells were treated with non-selective phosphodiesterase (PDE) inhibitor IBMX, CAR, ALP and CGP12177 were able to induce small but significant cAMP signal in HEK293 cells (**Fig. 3c**), indicating a role of PDE in suppressing and restricting the distribution of cAMP in the cells. When  $\beta_2$ AR was exogenously expressed in HEK293 cells, CAR and ALP were able to induce cAMP signal in HEK293 cells even without PDE inhibition (**Supplemental Fig. 4**), probably

due to insufficient cAMP-hydrolytic activity of endogenous PDEs to counter cAMP production induced from overexpressed  $\beta_2$ AR. We then engineered a targeted cAMP biosensor by fusing the biosensor ICUE3 to the C-terminus of  $\beta_2$ AR ( $\beta_2$ AR-ICUE3), aiming to detect increases of cAMP within the local domain of activated  $\beta_2$ AR. CAR and ALP promoted cAMP activity within the immediate vicinity of the receptor. CAR and ALP promoted cAMP signals within the local domain of activated  $\beta_2$ AR even at nanomolar concentrations (**Fig. 3d,e**). The local increases of cAMP were abolished by inhibition of  $\beta_2$ AR with ICI or inhibition of ACs with ddA (**Fig. 3e**). These data confirm that CAR and ALP promote cAMP/PKA activity within the local domain of activated  $\beta_2$ AR, in contrast to the broad distribution of cAMP/PKA activities induced by ISO in the cells.

### **Carvedilol augments the endogenous $\beta_2$ AR-dependent PKA phosphorylation of $\text{Ca}_v1.2$ and its channel activity in hippocampal neurons.**

The local cAMP signals possess the potential to selectively regulate downstream effectors in receptor complexes or within the vicinity of activated receptors. In the CNS,  $\beta_2$ AR emerges as a prevalent postsynaptic norepinephrine effector at glutamatergic synapses, where  $\beta_2$ AR functionally interacts with AMPA receptor (AMPA) and L-type  $\text{Ca}^{2+}$  channel (LTCC)  $\text{Ca}_v1.2$ , and regulates neuronal excitability and synaptic plasticity (30-33). CAR and ALP, but not TIM significantly increased PKA phosphorylation of S1928 and S1700 of central  $\alpha_11.2$  subunit of  $\text{Ca}_v1.2$  in hippocampal neurons when both  $\beta_2$ AR and LTCC were endogenously expressed (**Fig. 4a**). However, CAR and ALP failed to promote phosphorylation of the AMPAR subunit GluA1 on its PKA site serine 845 (**Fig. 4b**). Like  $\text{Ca}_v1.2$ , AMPARs are associated with  $\beta_2$ AR, Gs, AC and PKA (32-35). These results indicate high selectivity in targeting downstream substrates by this  $\beta$ -blocker-induced signaling in hippocampal neurons. Meanwhile, the CAR and ALP-induced PKA phosphorylation of LTCC were blocked by  $\beta_2$ AR inhibitor ICI, AC inhibitor ddA, and PKA inhibitor H89, but not CaMKII inhibitor KN93, validating the activation of  $\beta_2$ AR-cAMP-PKA pathway (**Fig. 4c**). We then examined the effects of CAR on PKA-dependent activation of LTCC  $\text{Ca}_v1.2$  channels

using single channel recordings in hippocampal neurons. Consistent with the phosphorylation data, CAR but not TIM significantly increased open probabilities of endogenous  $\text{Ca}_v1.2$  in hippocampal neurons (**Fig. 4d,e**). These data indicate that CAR promotes local cAMP/PKA activities for selective augmentation of LTCC activities in neurons.

### **Carvedilol but not isoproterenol selectively activates a mutant $\beta_2\text{AR}$ to augment LTCC activity in neurons.**

Structure-functional analyses of  $\beta_2\text{AR}$  have previously revealed distinct residues important for binding to catecholamines and  $\beta$ -blockers (36-39). We hypothesized that mutation of Ser204 and Ser207 sites within  $\beta_2\text{AR}$  binding pocket would abolish receptor hydrogen bonds with the catecholamine phenoxy moieties, thus reducing binding affinity to agonist ISO while having no effect on  $\beta$ -blocker binding (**Fig. 5a**). Such a mutant  $\beta_2\text{AR}$  could thus be selectively activated by CAR. We co-expressed the cAMP biosensor ICUE3 together with either wild-type (WT)  $\beta_2\text{AR}$  or mutant S204A/S207A  $\beta_2\text{AR}$  in MEF cells lacking endogenous  $\beta_1\text{AR}$  and  $\beta_2\text{AR}$  (DKO) to detect receptor signaling induced by different ligands. The mutant S204A/S207A  $\beta_2\text{AR}$  induced a moderate cAMP signal at high but not low concentrations of ISO (**Fig. 5b**). In contrast, after stimulation with CAR, the  $\beta_2\text{AR}$  mutant S204A/S207A promoted significant cAMP signals at nanomolar concentrations; the overall concentration response curve was similar to those induced by WT  $\beta_2\text{AR}$  (**Fig. 5b**). Accordingly, the ISO-induced PKA phosphorylation of  $\beta_2\text{AR}$  S204A/S207A mutant was selectively abolished at nanomolar concentrations. At higher concentrations, ISO was able to induce reduced PKA phosphorylation of the  $\beta_2\text{AR}$  S204A/S207A mutant when compared to WT  $\beta_2\text{AR}$ , consistent with the data of cAMP signals (**Fig. 5c**). Meanwhile, ISO failed to induce GRK phosphorylation of  $\beta_2\text{AR}$  S204A/S207A mutant at different concentrations (**Fig. 5c**). In comparison, CAR induced equivalent PKA phosphorylation of  $\beta_2\text{AR}$  WT and S204A/S207A mutant at different concentrations (**Fig. 5d**). These data suggest that CAR, but not ISO selectively activates the S204A/S207A mutant  $\beta_2\text{AR}$  at nanomolar concentrations. We then tested the effects

of  $\beta_2$ AR S204A/S207A mutant on LTCC channel activity after treatment with CAR in hippocampal neurons. In DKO neurons expressing the mutant S204A/S207A  $\beta_2$ AR, CAR, but not ISO (30 nM) promoted PKA phosphorylation of LTCC  $\alpha_1$ 1.2 (**Fig. 6a** and **Supplemental Fig. 5**). In agreement, CAR, but not ISO significantly increased open probabilities of  $\text{Ca}_v$ 1.2 (**Fig. 6b,c**). Together, CAR but not ISO selectively activates the S204A/S207A mutant  $\beta_2$ AR at low concentrations and increases channel opening probabilities.

## Discussion

In a classic view, agonist stimulation promotes both PKA and GRK phosphorylation of activated GPCRs. In this study using a combination of highly sensitive tools such as engineered FRET-based cAMP sensors and single channel recording together with detection with phospho-specific antibodies, we show that some  $\beta$ -blockers can promote activation of  $\beta_2$ AR and selectively transduce G protein/cAMP/PKA signaling but not GRK signaling. The  $\beta_2$ AR-induced cAMP signal is highly restricted to the local domain, which selectively promotes activation of receptor-associated LTCC but not AMPAR in primary hippocampal neurons. Moreover, we have engineered a mutant  $\beta_2$ AR that is selectively activated by  $\beta$ -blockers but not by catecholamines at low concentration. This study defines CAR and ALP as Gs-biased partial agonists of  $\beta$ AR for spatially highly restricted cAMP/PKA signaling to  $\text{Ca}_v$ 1.2 in neurons.

PKA-mediated phosphorylation is thought to play critical roles in heterologous desensitization of GPCRs and in receptor switching from Gs to Gi coupling (40, 41), whereas GRK-mediated phosphorylation is implicated in  $\beta$ -arrestin recruitment and  $\beta$ -arrestin-dependent ERK activation (13-18). We have recently characterized that PKA and GRKs phosphorylate distinct subpopulations of  $\beta_2$ AR in a single fibroblast or neuron (12). While GRK phosphorylation of  $\beta_2$ AR is only observed at high concentrations of agonists, PKA phosphorylation can be induced with minimal doses of agonist (12, 27, 28, 42). Here, our data show CAR does not promote GRK phosphorylation at low concentrations and induces a slow and minimal GRK effect at

high concentrations when compared to those induced by ISO. The CAR-induced GRK effects are minimally related to the PKA effects. Previously, CAR has been recognized as a biased  $\beta$ -blocker that preferentially activates  $\beta$ -arrestin/ERK pathways (29, 43). Despite the prominent role of GRK phosphorylation in full agonist ISO-induced  $\beta_2$ AR- $\beta$ -arrestin/ERK signaling, our data clearly indicate that GRK phosphorylation of  $\beta_2$ AR is not necessary for CAR-induced activation of ERK, consistent with a recent study showing a distinct general mechanism of  $\beta$ -arrestin activation that does not require the GRK-phosphorylated tail of different GPCRs (44). Meanwhile, other studies show that in the absence of all G proteins, GPCRs fail to transduce  $\beta$ -arrestin/ERK signaling (45). These data indicate the necessity of G proteins in GPCR-induced arrestin activation. In our study, we observed that a concentration-dependent correlation between PKA phosphorylation of  $\beta_2$ AR with ERK activity induced by  $\beta$ -blockers, suggesting the potential role of  $G_s$  and PKA in CAR-induced  $\beta_2$ AR- $\beta$ -arrestin/ERK signaling are overlooked. In comparison,  $G_i$  is not required for CAR-induced  $\beta_2$ AR/ $\beta$ -arrestin signaling even though CAR induces  $G_i$  recruitment to  $\beta_1$ AR for transducing  $\beta_1$ AR/ $\beta$ -arrestin signaling (46). Moreover, our results are also in line with a recent report that activation of  $\beta_2$ AR with as low as femtomolar concentrations of ligands causes sustained ERK signaling (47), further support a PKA but GRK-dependent mechanism in GPCR-induced ERK activation. Future studies will help us understand how ligand-induced GPCRs utilize distinct mechanisms in activating  $\beta$ -arrestin/ERK pathway.

Engineered GPCRs have been widely applied in investigating structural and biological processes and behaviors by precisely controlling specific GPCR signaling branches (46). Previous mutagenesis studies have shown that  $\beta_2$ AR with S204/207A mutation loses binding to adrenaline but still binds with several  $\beta$ -blockers including ALP (37). Based on this and recent advances in  $\beta$ AR structures with agonists and  $\beta$ -blockers (38, 39), we have generated a S204/207A mutant that bestow  $\beta_2$ AR with the ability to be selectively activated by  $\beta$ -blockers such as CAR and to transduce cAMP/PKA signaling. At nanomolar concentrations, while ISO fails to stimulate PKA

phosphorylation of the S204/207A mutant  $\beta_2$ AR, the mutant receptor still retains CAR-induced stimulation of PKA-phosphorylation of the receptor. The CAR-induced activation of mutant  $\beta_2$ AR triggers the  $\beta_2$ AR/Gs/cAMP/PKA signaling pathway and selectively targets downstream effectors in primary hippocampal neurons. Interestingly, the S204/207A  $\beta_2$ AR mutant is not only refractory to its agonists but also completely lost both ISO- and CAR-induced GRK-phosphorylation of  $\beta_2$ AR. Further studies comparing this mutant with previous reported  $\beta_2$ AR-TYY and Y219A mutants that lack Gs and GRKs coupling, respectively (18, 47), will facilitate the analysis of the physiological relevance of Gs/cAMP/PKA-dependent and GRK-dependent signaling pathways and enable researchers to explore  $\beta$ -arrestin/ERK pathway devoid of individual signaling branches.

$\beta$ -blockers are a standard clinical treatment in a broad range of diseases. Many  $\beta$ -blockers possess intrinsic sympathomimetic activities (19, 20), which are problematic due to the side effects through stimulation of  $\beta$ ARs (19, 20), a feature that limits the clinical utility of the drugs. Here, we show that  $\beta$ -blockers promote activation of  $\beta_2$ AR by recruiting Gs that selectively transduces cAMP/PKA signal but not GRK signal. Meanwhile, binding of  $\beta$ -blockers to  $\beta_1$ AR has been shown to enhance cAMP levels locally by dissociating a  $\beta_1$ AR-PDE4 complex, thereby reducing the local cAMP-hydrolytic activity (48),  $\beta_1$ AR and  $\beta_2$ AR thus could utilize different mechanisms for  $\beta$ -blocker-induced signaling. Another interesting observation is that the  $\beta$ -blocker-induced  $\beta_2$ AR-cAMP signal is sufficient to promote PKA phosphorylation of both  $\beta_2$ AR and the receptor-associated  $\text{Ca}_v1.2$  of LTCC, but not another substrate, the AMPAR GluA1 subunit. Both LTCC and AMPAR are shown to associate with the  $\beta_2$ AR in hippocampal neurons (30-33). Therefore, the preference of one local membrane target over another local target indicates a highly restricted nature of the cAMP-PKA activities, potentially dependent on the recently identified distinct subpopulations of  $\beta_2$ AR and associated signaling molecules in the neurons (12). Nevertheless, the PKA phosphorylation leads to augmentation of LTCC activity, potentially contributing to the neuronal toxicities. Therefore, activation of GPCR at low

ligand concentrations should be taken into consideration when designing and screening new therapeutic drugs.

## Methods

### Plasmids

DNA constructs expressing FLAG-tagged human  $\beta_2$ AR (FLAG- $\beta_2$ AR) and HA-tagged rat L-type calcium channel (LTCC)  $\alpha_1$ 1.2 were described before (12). FLAG-tagged human  $\beta_2$ AR with S204/207A double mutations (FLAG-mutant) was generated by Gibson assembly method (Thermo Fisher) using FLAG- $\beta_2$ AR and synthetic gBlocks with the double mutations as templates (Integrated DNA Technologies). FRET biosensor ICUE3 was described before (34). To make the  $\beta_2$ AR-ICUE3 fusion biosensor, ICUE3 was fused to the C-terminal of FLAG- $\beta_2$ AR with Gly-Ser linker. HA-Gs $\alpha$  was made by replacing CFP with HA tag, using Gs $\alpha$ -CFP as template (a gift from Dr. Catherine Berlot, Addgene plasmid # 55793).

### Antibodies and Chemicals

Mouse monoclonal antibodies against  $\beta_2$ AR at serine 261/262 (clone 2G3) and at serine 355/356 (clone 10A5) were kindly provided by Dr. Richard Clark (UT Huston). Polyclonal antibodies against  $\beta_2$ AR (sc-570) and phosphorylated  $\beta_2$ AR at serine 355/356 (sc-16719R) were purchased from Santa Cruz Biotechnology. Polyclonal antibodies against  $\alpha_1$ 1.2 residues 754-901 for total  $\alpha_1$ 1.2 (FP1), residues 1923-1935 for phosphorylated serine 1928 site (LGRRApSFHLECLK, pS1928) and residues 1694-1709 for phosphorylated serine 1700 site (EIRRAIpSGDLTAEEL, pS1700) were described before (49). Polyclonal antibodies against GluA1 residues 894-907 for total GluA1, residues 826-837 for phosphorylated serine 831 site (LIPQQpSINEAIK, pS831) and residues 840-851 for phosphorylated serine 845 site (TLPRNpSGAGASK, pS845) were from Cell Signaling (Danvers, MA). Other antibodies used in the experiments include: anti-FLAG (F3040, Sigma), anti-HA (MMS-101R, Covance), Alexa fluor 488 conjugated goat anti-rabbit IgG and Alexa fluor 594 conjugated goat anti-mouse IgG (A-11034 and A-11032, Thermo Fisher), DyLight 680 conjugated goat



anti-mouse IgG and anti-rabbit IgG (35518 and 35568, Thermo Fisher), IRDye 800CW conjugated goat anti-mouse IgG and anti-rabbit IgG (926-32210 and 926-32211, Li-cor).

Isoproterenol (I2760), timolol (T6394), alprenolol (A8676), propranolol (P0884), metoprolol (M5391), CGP12177A (C125), CGP20712A (C231), ICI118551 (I127), 3-isobutyl-1-methylxanthine (I5879) and 2',5'-dideoxyadenosine (D7408) were purchased from Sigma. Carvedilol (15418) was from Cayman Chemical, H89 (H-5239) was from LC Labs, pertussis toxin (179B) was from List Labs.

### **Cell Culture and Transfection**

Human embryonic kidney HEK293 cells were from American Type Culture Collection (ATCC) and were maintained in Dulbecco's modified Eagle medium (DMEM, Corning) supplemented with 10% fetal bovine serum (FBS, Sigma). HEK293 cells stably expressing FLAG- $\beta_2$ AR was from previous study (35). HEK293 cells stably expressing FLAG-mutant  $\beta_2$ AR was generated in this study. Briefly, cells transfected with  $\beta_2$ AR-mutant were selected by G418 resistance (Corning) and cell clones were obtained by limiting serial dilution, monoclonal cells were analyzed by western blots and the one with comparable  $\beta_2$ AR expression to FLAG- $\beta_2$ AR stable cells was chosen. Mouse embryonic fibroblasts (MEFs) from  $\beta_1$ AR/ $\beta_2$ AR double knockout (DKO) mouse was described in previous study (50) and were maintained in DMEM supplemented with 10% FBS. Primary mouse hippocampal neurons were isolated and cultured from P0-P1 early postnatal DKO mouse pups, and primary rat hippocampal neurons were prepared from E17-E19 embryonic rats using methods described previously (51, 52). Briefly, dissected hippocampi were dissociated by 0.25% trypsin (Corning) and trituration. Neurons were plated on poly-D-lysine-coated (Sigma) glass coverslips in 24-well plate for imaging and in 6-well plate for biochemistry at a cell density of 50,000/well and 1 million/well, respectively. Neurons were cultured in Neurobasal medium supplemented with GlutaMax and B-27 (Thermo Fisher). Animal protocols were approved by IACUC of the University of California at Davis according to NIH



regulations.

HEK293 cells were transfected with plasmids using polyethylenimine according to manufacturer's instructions (Sigma). Neurons were transfected by the  $\text{Ca}^{2+}$ -phosphate method (53). Briefly, cultured neurons on 6-10 DIV were switched to pre-warmed Eagle's minimum essential medium (EMEM, Thermo Fisher) supplemented with GlutaMax 1 hour before transfection, conditioned media were saved. DNA precipitates were prepared by 2x HBS (pH 6.96) and 2 M  $\text{CaCl}_2$ . After incubation with DNA precipitates for 1 hour, neurons were incubated in 10%  $\text{CO}_2$  pre-equilibrium EMEM for 20 minutes, then replaced with conditioned medium and cultured in 5%  $\text{CO}_2$  incubator until use.

### **Confocal Microscopy Imaging**

Rat hippocampal neurons were transfected with FLAG- $\beta_2$ AR on 10 DIV, treated for 5 minutes with 10 nM or 1  $\mu\text{M}$  indicated drugs on 12 DIV. Mouse DKO hippocampal neurons were transfected with FLAG- $\beta_2$ AR or FLAG-mutant and HA- $\alpha_1$ 1.2 at 1:1 ratio on 6-8 DIV, and stimulated with indicated drugs and times 24 hours after transfection. Treated cells were fixed, permeabilized, and co-stained with indicated antibodies with a final concentration of 1  $\mu\text{g/ml}$  for each antibody, which were revealed by a 1:1000 dilution of Alexa fluor 488 conjugated goat anti-rabbit IgG or Alexa fluor 594 conjugated goat anti-mouse IgG, respectively. Fluorescence images were taken by Zeiss LSM 700 confocal microscope with a 63x/1.4 numerical aperture oil-immersion lens.

### **Proximity ligation assay**

HEK293 cells growing on poly-D-lysine coated coverslips were transfected with FLAG- $\beta_2$ AR or FLAG-mutant, HA-Gs $\alpha$  and pEYFP-N1 at 8:1:1 ratio. 24 hours after transfection, cells were serum-starved 2 hours, treated 100 nM indicated drugs for 5 minutes. Following stimulation, cells were fixed, permeabilized, and co-stained with anti- $\beta_2$ AR antibody (1:100 dilution) from rabbit in conjunction with anti-HA antibody (1:1000 dilution) from mouse. The proximity ligation reaction was performed

according to the manufacturer's protocol using the Duolink in situ detection orange reagents (Sigma). Images were recorded with Zeiss LSM 700 confocal microscope with a 63×/1.4 numerical aperture oil-immersion lens. To quantify the PLA signals, the number of red fluorescent objects in each image was quantified using the Squassh plug-in for ImageJ software (54), and divided by the number of transfected cells.

### **Fluorescence resonance energy transfer (FRET) measurement**

FRET measurement was performed as previously described (35). Briefly, HEK 293 cells were transfected with ICUE3 or  $\beta_2$ AR-ICUE3, DKO MEFs were co-transfected with ICUE3 and FLAG- $\beta_2$ AR or FLAG-mutant. Cells were imaged on a Zeiss Axiovert 200M microscope with a 40×/1.3 numerical aperture oil-immersion lens and a cooled CCD camera. Dual emission ratio imaging was acquired with a 420DF20 excitation filter, a 450DRLP dichroic mirror, and two emission filters (475DF40 for cyan and 535DF25 for yellow). The acquisition was set with 0.2 second exposure in both channels and 20 second elapses. Images in both channels were subjected to background subtraction, and ratios of yellow-to-cyan were calculated at different time points.

### **Western blot**

HEK293 cells stably expressing FLAG- $\beta_2$ AR or FLAG-mutant were serum-starved for 2 hours and treated with indicated drugs and times, then harvested by lysis buffer (10 mM Tris pH 7.4, 1% NP40, 150 mM NaCl, 2 mM EDTA) with protease and phosphatase inhibitor cocktail. Rat hippocampal neurons on 10-14 DIV were treated with indicated drugs and times, then harvested by lysis buffer (10 mM Tris pH 7.4, 1% TX-100, 150 mM NaCl, 5 mM EGTA, 10 mM EDTA, 10% glycerol) with protease and phosphatase inhibitor cocktail. Protein samples were analyzed by Western blot using antibodies as indicated at a 1:1000 dilution and signals were detected by Odyssey scanner (Li-cor). Uncropped scans are presented in Supplemental Fig. 6.

### **Cell-attached Patch Clamp Electrophysiology**

Primary rat and mouse hippocampal neurons were used on 7-10 DIV. Cell-attached patch clamp recordings were performed on an Olympus IX70 inverted microscope in a 15-mm culture coverslip at room temperature (22-25 °C). Signals were recorded at 10 kHz and low-pass filtered at 2 kHz with an Axopatch 200B amplifier and digitized with a Digidata 1440 (Molecular Devices). Recording pipettes were pulled from borosilicate capillary glass (0.86 OD) with a Flaming micropipette puller (Model P-97, Sutter Instruments) and polished (polisher from World Precision Instruments). Pipette resistances were strictly maintained between 6-7 MΩ to ameliorate variations in number of channels in the patch pipette. The patch transmembrane potential was zeroed by perfusing cells with a high K<sup>+</sup> extracellular solution containing (in mM) 145 KCl, 10 NaCl, and 10 HEPES, pH 7.4 (NaOH). The pipette solution contained (in mM) 20 tetraethylammonium chloride (TEA-Cl), 110 BaCl<sub>2</sub> (as charge carrier), and 10 HEPES, pH 7.3 (TEA-OH). This pipette solution was supplemented with 1 μM ω-conotoxin GVIA and 1 μM ω-conotoxin MCVIIC to block N and P/Q-type Ca<sup>2+</sup> channels, respectively, and (S)-(-)-BayK-8644 (500 nM) was included in the pipette solution to promote longer open times and resolve channel openings. Indeed, BayK-8644 is routinely used to augment detection of L-type channels in single-channel recordings (49, 55, 56). To examine the effects of β-adrenergic stimulation on the L-type Ca<sub>v</sub>1.2 single-channel activity, 1 μM isoproterenol was added to the pipette solution in independent experiments. Note that we have previously used the L-type Ca<sub>v</sub>1.2 channel blocker nifedipine (1 μM) to confirm the recording of L-type Ca<sub>v</sub>1.2 currents under control conditions and in the presence of isoproterenol (49). Single-channel activity was recorded during a single pulse protocol (2 seconds) from a holding potential of -80 mV to 0 mV every 5 seconds. An average of 50 sweeps were collected with each recording file under all experimental conditions. The half-amplitude event-detection algorithm of pClamp 10 was used to measure overall single-channel L-type Ca<sub>v</sub>1.2 activity as nPo, where n is the number of channels in the patch and Po is the open probability. Note that the number of channels in each patch recording (n) was not estimated and that all data are presented as "nPo" (product of n and channel open probability). nPo values were pooled for each

condition and analyzed with GraphPad Prism software.

## Statistical analysis

Data were analyzed using GraphPad Prism software and expressed as mean  $\pm$  s.e.m. Differences between two groups were assessed by appropriate two-tailed unpaired Student's t-test or nonparametric Mann-Whitney test. Differences among three or more groups were assessed by One-way ANOVA with Tukey's post hoc test.  $P < 0.05$  was considered statistically significant.

## Data availability

The data that support the findings of this study are available from the corresponding author upon reasonable request.

## Acknowledgements

This work was supported by NIH grant GM129376 and VA Merit grant BX002900 to Y.K.X., HL098200 and HL121059 to M.F.N. A.S. and Q.S. were recipients of AHA postdoctoral fellowship. Y.K.X. is an established AHA investigator.

## Author contributions

A.S. and Y.K.X. conceived and designed experiments. A.S. generated DNA constructs and stable cells, did mouse neuron culture, imaging, FRET and Western blot. M.F.N. performed single channel recording. D.C., B.X. and J.M.M helped Western blot. M.K and Q.S. helped DNA constructs and FRET. K.M.M provided rat neuron culture. A.S. and Y.K.X. interpreted all the data and wrote the manuscript with inputs from X.-Y.Y., J.W.H. and M.F.N. Y.K.X. provided overall project supervision.

## Figure Legend

**Figure 1 Carvedilol and alprenolol selectively promote phosphorylation of  $\beta_2$ AR at PKA sites.** HEK293 cells stably expressing FLAG-tagged  $\beta_2$ AR were either directly stimulated for 5 minutes with the  $\beta$ AR agonist ISO and different  $\beta$ -blockers at

indicated concentrations (**a**), or pretreated for 15 minutes with 1  $\mu$ M  $\beta_1$ AR antagonist CGP20712A (**b**) or 10  $\mu$ M  $\beta_2$ AR antagonist ICI118551 (**c**) before the treatment. The phosphorylation levels of  $\beta_2$ AR on its PKA and GRK sites were determined by Western blot with phosphor-specific antibodies, and signals were normalized to total  $\beta_2$ AR detected with anti-FLAG antibody. NT, no treatment; ISO, isoproterenol; TIM, timolol; ALP, alprenolol; CAR, carvedilol; ICI, ICI118551; PRO, propranolol; MET, metoprolol; 177, CGP12177; CGP, CGP20712A. Error bars denote s.e.m., P values are computed by one-way ANOVA followed by Tukey's test between NT and other groups.

**Figure 2 Carvedilol and alprenolol induce concentration-dependent PKA phosphorylation of  $\beta_2$ AR in HEK293 and hippocampal neurons.** HEK293 cells stably expressing FLAG-tagged  $\beta_2$ AR were treated with increasing concentrations of CAR (**a**) and ALP (**b**) or pretreated for 15 minutes with 10  $\mu$ M  $\beta_2$ AR antagonist ICI118551 (**c**) and PKA inhibitor H89 (**d**) before stimulated with 1  $\mu$ M indicated drugs for 5 minutes. The phosphorylation levels of  $\beta_2$ AR on its PKA and GRK sites were determined with phosphor-specific antibodies, and signals were normalized to total  $\beta_2$ AR detected with anti-FLAG antibody. Experiments were performed in the presence of 1  $\mu$ M  $\beta_1$ AR-selective antagonist CGP20712A to block endogenous  $\beta_1$ AR signaling. NT, no treatment; ISO, isoproterenol; ALP, alprenolol; CAR, carvedilol; ICI, ICI118551. Error bars denote s.e.m., P values are computed by one-way ANOVA followed by Tukey's test between NT and other groups. **e** Rat hippocampal neurons expressing  $\beta_2$ AR were treated for 5 minutes with 10 nM or 1  $\mu$ M indicated drugs on 12 DIV and immuno-stained for PKA-phosphorylated  $\beta_2$ AR. Confocal images show PKA-phosphorylated  $\beta_2$ AR in agonist- or  $\beta$ -blocker-stimulated neurons have similar distribution. Scale bar, 10  $\mu$ m. Representative of 6 images for each condition, three experiments.

**Figure 3 Carvedilol and alprenolol promote Gs $\alpha$  recruitment to  $\beta_2$ AR and increase locally restricted cAMP signal.** **a** HEK293 cells co-expressing

FLAG-tagged  $\beta_2$ AR, HA-tagged Gs $\alpha$  and EGFP were stimulated with 100 nM ISO or indicated  $\beta$ -blockers for 5 minutes. In proximity ligation assay (PLA), cells were immuno-stained with HA and  $\beta_2$ AR antibody, nuclei were counterstained with DAPI. The green EGFP signal represents transfected cells, and red PLA signal represents Gs $\alpha$  and  $\beta_2$ AR interactions. Carvedilol and alprenolol promoted Gs $\alpha$  recruitment to  $\beta_2$ AR, but timolol could not. Scale bar, 10  $\mu$ m. Representative of n= 6, 6, 6, 6, 11 and 8 images respectively, three experiments. **b-c** HEK293 cells expressing ICUE3 biosensor were treated with 1  $\mu$ M ISO or indicated  $\beta$ -blockers (**b**), or together with 100  $\mu$ M phosphodiesterase inhibitor IBMX (**c**). **d-e** HEK293 cells expressing  $\beta_2$ AR-ICUE3 biosensor were treated with indicated concentration of ISO or  $\beta$ -blockers. In some cases, cells were pretreated for 30 minutes with the  $\beta_2$ AR antagonist ICI (10  $\mu$ M) or the adenylyl cyclase inhibitor ddA (50  $\mu$ M) before adding  $\beta$ -blockers. Changes in ICUE3 FRET ratio (an indication of cAMP activity) were measured. Experiments were performed in the presence of 1  $\mu$ M  $\beta_1$ AR-selective antagonist CGP20712A to block endogenous  $\beta_1$ AR signaling. Mock, no primary antibody; NT, no treatment; ISO, isoproterenol; TIM, timolol; ALP, alprenolol; CAR, carvedilol; ICI, ICI118551; PRO, propranolol; MET, metoprolol; 177, CGP12177, IBMX, 3-isobutyl-1-methylxanthine; ddA, 2',5'-dideoxyadenosine. Error bars denote s.e.m., P values are computed by one-way ANOVA followed by Tukey's test between NT (**a**) or TIM (**b-e**) and other groups.

**Figure 4 Carvedilol promotes endogenous  $\beta_2$ AR-dependent phosphorylation of LTCC  $\alpha_1.2$  by PKA and augment of channel activity in hippocampal neurons. a** Rat neurons on 10-14 DIV were treated for 5 minutes with 1  $\mu$ M indicated drugs. The phosphorylation of endogenous LTCC  $\alpha_1.2$  subunit was determined with phospho-specific antibodies and normalized to total  $\alpha_1.2$ . **b** Neurons on 10-14 DIV were treated for 5 minutes with 1  $\mu$ M indicated drugs. The phosphorylation of endogenous AMPAR GluA1 subunit was determined with phosphor-specific antibodies, and signals were normalized to total GluA1. **c** Neurons were pretreated for 30 minutes with 10  $\mu$ M  $\beta_2$ AR inhibitor ICI, 50  $\mu$ M AC inhibitor ddA, 10  $\mu$ M PKA inhibitor

H89 or 10  $\mu$ M CaMKII inhibitor KN93 and then stimulated with 1  $\mu$ M CAR for 5 minutes. Carvedilol-induced LTCC phosphorylation depends on endogenous  $\beta_2$ AR, AC and PKA, but not CaMKII. **d** Representative single-channel recordings of endogenous LTCC  $\text{Ca}_v1.2$  currents in rat hippocampal neurons on 7-10 DIV after depolarization from  $-80$  to  $0$ mV without (NT) and with stimulation of 1  $\mu$ M indicated drugs in the patch pipette. Arrows throughout the figure indicate the 0-current level (closed channel). **e** The overall channel activity (nPo) of  $\text{Ca}_v1.2$  was quantified from **d**. Error bars denote s.e.m., P values are computed by one-way ANOVA followed by Tukey's test between NT and other groups in **a-c** and Mann-Whitney test in **e**.

**Figure 5 A mutant  $\beta_2$ AR is selectively activated by carvedilol but not isoproterenol.** **a** Schematic of an engineered  $\beta_2$ AR with S204/207A double serine mutations that loses high affinity binding to ISO but not CAR at nanomolar range. **b** cAMP biosensor ICUE3 and  $\beta_2$ AR wild-type (WT) or mutant were co-expressed in MEF cells lacking both  $\beta_1$ AR and  $\beta_2$ AR. Changes of cAMP FRET ratio by increasing concentrations of ISO or CAR were measured. **c-d** HEK293 cells stably expressing FLAG-tagged  $\beta_2$ AR WT or mutant were stimulated for 5 minutes with increasing concentrations of ISO (**c**) or CAR (**d**). The phosphorylation of  $\beta_2$ AR on its PKA and GRK sites were determined by Western blot with phospho-specific antibodies, and signals were normalized to total  $\beta_2$ AR detected with anti-FLAG antibody. Experiments were performed in the presence of 1  $\mu$ M  $\beta_1$ AR-selective antagonist CGP20712A to block endogenous  $\beta_1$ AR signaling. NT, no treatment; ISO, isoproterenol; CAR, carvedilol. Error bars denote s.e.m., P values are computed by one-way ANOVA followed by Tukey's test between NT and other concentrations.

**Figure 6 Carvedilol selectively activates the mutant  $\beta_2$ AR and promotes LTCC activity in hippocampal neurons.** **a**  $\beta_1$ AR/ $\beta_2$ AR double knockout (DKO) mouse hippocampal neurons on 7-10 days in vitro (DIV) were cotransfected with FLAG-tagged  $\beta_2$ AR WT or mutant and HA-tagged LTCC  $\alpha_11.2$  subunit, 24 hours later cells were either mock treated (upper panel), or treated for 5 minutes with 10 nM ISO



(middle panel) or 10 nM CAR (lower panel), fixed and labeled with anti-FLAG and a phosphor-specific antibody for S1928 phosphorylated  $\alpha_1$ 1.2. Representative confocal images show mutant  $\beta_2$ AR lost the ability of promoting LTCC phosphorylation upon ISO stimulation but remained the ability upon CAR stimulation in mouse neurons. Scale bar, 10  $\mu$ m. Representative of 6 images for each condition, three experiments.

**b** Representative single-channel recordings of LTCC  $\text{Ca}_v1.2$  currents in DKO neurons on 7-10 DIV expressing mutant  $\beta_2$ AR after depolarization from  $-80$  to  $0$ mV without (black traces) and with stimulation of 30 nM indicated drugs in the patch pipette. Arrows throughout the figure indicate the 0-current level (closed channel). **c** The overall channel activity (nPo) of LTCC  $\text{Ca}_v1.2$  was quantified from **b**. Error bars denote s.e.m. with Mann-Whitney test.

## References

1. Lefkowitz RJ (2000) The superfamily of heptahelical receptors. *Nature cell biology* 2(7):E133-136.
2. Xiang Y & Kobilka BK (2003) Myocyte adrenoceptor signaling pathways. *Science* 300(5625):1530-1532.
3. Reiter E & Lefkowitz RJ (2006) GRKs and beta-arrestins: roles in receptor silencing, trafficking and signaling. *Trends in endocrinology and metabolism: TEM* 17(4):159-165.
4. Lefkowitz RJ (2007) Seven transmembrane receptors: something old, something new. *Acta physiologica (Oxford, England)* 190(1):9-19.
5. Nobles KN, *et al.* (2011) Distinct phosphorylation sites on the beta(2)-adrenergic receptor establish a barcode that encodes differential functions of beta-arrestin. *Science signaling* 4(185):ra51.
6. Wisler JW, Xiao K, Thomsen ARB, & Lefkowitz RJ (2014) Recent developments in biased agonism. *Current opinion in cell biology* 27(Supplement C):18-24.
7. Zweemer AJM, Toraskar J, Heitman LH, & Ijzerman AP (2014) Bias in chemokine receptor signalling. *Trends in Immunology* 35(6):243-252.
8. Najafi A, Sequeira V, Kuster DW, & van der Velden J (2016) beta-adrenergic receptor signalling and its functional consequences in the diseased heart. *European journal of clinical investigation* 46(4):362-374.
9. Mammarella N, Di Domenico A, Palumbo R, & Fairfield B (2016) Noradrenergic modulation of emotional memory in aging. *Ageing research reviews* 27:61-66.
10. Fu Q, Shi Q, West TM, & Xiang YK (2017) Cross-Talk Between Insulin Signaling and G Protein-Coupled Receptors. *Journal of cardiovascular pharmacology* 70(2):74-86.
11. Matera MG, Page C, & Rinaldi B (2018) beta2-Adrenoceptor signalling bias in asthma and COPD and the potential impact on the comorbidities associated with these diseases. *Current opinion in pharmacology* 40:142-146.



12. Shen A, *et al.* (2018) Functionally distinct and selectively phosphorylated GPCR subpopulations co-exist in a single cell. *Nature communications* 9(1):1050.
13. Luttrell LM, *et al.* (1999) Beta-arrestin-dependent formation of beta2 adrenergic receptor-Src protein kinase complexes. *Science (New York, N.Y.)* 283(5402):655-661.
14. Pierce KL, Maudsley S, Daaka Y, Luttrell LM, & Lefkowitz RJ (2000) Role of endocytosis in the activation of the extracellular signal-regulated kinase cascade by sequestering and nonsequestering G protein-coupled receptors. *Proceedings of the National Academy of Sciences of the United States of America* 97(4):1489-1494.
15. Kim J, *et al.* (2005) Functional antagonism of different G protein-coupled receptor kinases for beta-arrestin-mediated angiotensin II receptor signaling. *Proceedings of the National Academy of Sciences of the United States of America* 102(5):1442-1447.
16. Ren XR, *et al.* (2005) Different G protein-coupled receptor kinases govern G protein and beta-arrestin-mediated signaling of V2 vasopressin receptor. *Proceedings of the National Academy of Sciences of the United States of America* 102(5):1448-1453.
17. Zidar DA, Violin JD, Whalen EJ, & Lefkowitz RJ (2009) Selective engagement of G protein coupled receptor kinases (GRKs) encodes distinct functions of biased ligands. *Proceedings of the National Academy of Sciences of the United States of America* 106(24):9649-9654.
18. Choi M, *et al.* (2018) G protein-coupled receptor kinases (GRKs) orchestrate biased agonism at the beta2-adrenergic receptor. *Science signaling* 11(544).
19. Bakris G (2009) An in-depth analysis of vasodilation in the management of hypertension: focus on adrenergic blockade. *Journal of cardiovascular pharmacology* 53(5):379-387.
20. Gorre F & Vandekerckhove H (2010) Beta-blockers: focus on mechanism of action. Which beta-blocker, when and why? *Acta cardiologica* 65(5):565-570.
21. Yao XJ, *et al.* (2009) The effect of ligand efficacy on the formation and stability of a GPCR-G protein complex. *Proceedings of the National Academy of Sciences of the United States of America* 106(23):9501-9506.
22. DeVree BT, *et al.* (2016) Allosteric coupling from G protein to the agonist-binding pocket in GPCRs. *Nature* 535(7610):182-186.
23. Gregorio GG, *et al.* (2017) Single-molecule analysis of ligand efficacy in beta2AR-G-protein activation. *Nature* 547(7661):68-73.
24. Maack C, *et al.* (2000) Different intrinsic activities of bucindolol, carvedilol and metoprolol in human failing myocardium. *British journal of pharmacology* 130(5):1131-1139.
25. Brixius K, Bundkirchen A, Bolck B, Mehlhorn U, & Schwinger RH (2001) Nebivolol, bucindolol, metoprolol and carvedilol are devoid of intrinsic sympathomimetic activity in human myocardium. *British journal of pharmacology* 133(8):1330-1338.
26. Larochelle P, Tobe SW, & Lacourciere Y (2014) beta-Blockers in hypertension: studies and meta-analyses over the years. *The Canadian journal of cardiology* 30(5 Suppl):S16-22.
27. Tran TM, *et al.* (2004) Characterization of agonist stimulation of cAMP-dependent protein kinase and G protein-coupled receptor kinase phosphorylation of the beta2-adrenergic receptor using phosphoserine-specific antibodies. *Molecular pharmacology* 65(1):196-206.
28. Tran TM, *et al.* (2007) Characterization of beta2-adrenergic receptor dephosphorylation: Comparison with the rate of resensitization. *Molecular pharmacology* 71(1):47-60.
29. Wisler JW, *et al.* (2007) A unique mechanism of beta-blocker action: carvedilol stimulates beta-arrestin signaling. *Proceedings of the National Academy of Sciences of the United States*

- of America* 104(42):16657-16662.
30. Davare MA, *et al.* (2001) A beta2 adrenergic receptor signaling complex assembled with the Ca<sup>2+</sup> channel Cav1.2. *Science (New York, N.Y.)* 293(5527):98-101.
31. Joiner ML, *et al.* (2010) Assembly of a beta2-adrenergic receptor--GluR1 signalling complex for localized cAMP signalling. *The EMBO journal* 29(2):482-495.
32. Wang D, *et al.* (2010) Binding of amyloid beta peptide to beta2 adrenergic receptor induces PKA-dependent AMPA receptor hyperactivity. *FASEB journal : official publication of the Federation of American Societies for Experimental Biology* 24(9):3511-3521.
33. Qian H, *et al.* (2012) beta2-Adrenergic receptor supports prolonged theta tetanus-induced LTP. *Journal of neurophysiology* 107(10):2703-2712.
34. DiPilato LM & Zhang J (2009) The role of membrane microdomains in shaping beta2-adrenergic receptor-mediated cAMP dynamics. *Molecular bioSystems* 5(8):832-837.
35. De Arcangelis V, Liu R, Soto D, & Xiang Y (2009) Differential association of phosphodiesterase 4D isoforms with beta2-adrenoceptor in cardiac myocytes. *The Journal of biological chemistry* 284(49):33824-33832.
36. Strader CD, Candelore MR, Hill WS, Sigal IS, & Dixon RA (1989) Identification of two serine residues involved in agonist activation of the beta-adrenergic receptor. *The Journal of biological chemistry* 264(23):13572-13578.
37. Liapakis G, *et al.* (2000) The forgotten serine. A critical role for Ser-2035.42 in ligand binding to and activation of the beta 2-adrenergic receptor. *The Journal of biological chemistry* 275(48):37779-37788.
38. Warne T, Edwards PC, Leslie AG, & Tate CG (2012) Crystal structures of a stabilized beta1-adrenoceptor bound to the biased agonists bucindolol and carvedilol. *Structure (London, England : 1993)* 20(5):841-849.
39. Ring AM, *et al.* (2013) Adrenaline-activated structure of beta2-adrenoceptor stabilized by an engineered nanobody. *Nature* 502(7472):575-579.
40. Daaka Y, Luttrell LM, & Lefkowitz RJ (1997) Switching of the coupling of the beta2-adrenergic receptor to different G proteins by protein kinase A. *Nature* 390(6655):88-91.
41. Zamah AM, Delahunty M, Luttrell LM, & Lefkowitz RJ (2002) Protein kinase A-mediated phosphorylation of the beta 2-adrenergic receptor regulates its coupling to Gs and Gi. Demonstration in a reconstituted system. *The Journal of biological chemistry* 277(34):31249-31256.
42. Liu R, Ramani B, Soto D, De Arcangelis V, & Xiang Y (2009) Agonist dose-dependent phosphorylation by protein kinase A and G protein-coupled receptor kinase regulates beta2 adrenoceptor coupling to G(i) proteins in cardiomyocytes. *The Journal of biological chemistry* 284(47):32279-32287.
43. Kim IM, *et al.* (2008) Beta-blockers alprenolol and carvedilol stimulate beta-arrestin-mediated EGFR transactivation. *Proceedings of the National Academy of Sciences of the United States of America* 105(38):14555-14560.
44. Eichel K, *et al.* (2018) Catalytic activation of beta-arrestin by GPCRs. *Nature* 557(7705):381-386.
45. Grundmann M, *et al.* (2018) Lack of beta-arrestin signaling in the absence of active G proteins. *Nature communications* 9(1):341.

46. Lee HM, Giguere PM, & Roth BL (2014) DREADDs: novel tools for drug discovery and development. *Drug discovery today* 19(4):469-473.
47. Shenoy SK, *et al.* (2006) beta-arrestin-dependent, G protein-independent ERK1/2 activation by the beta2 adrenergic receptor. *The Journal of biological chemistry* 281(2):1261-1273.
48. Richter W, Mika D, Blanchard E, Day P, & Conti M (2013) beta1-adrenergic receptor antagonists signal via PDE4 translocation. *EMBO reports* 14(3):276-283.
49. Patriarchi T, *et al.* (2016) Phosphorylation of Cav1.2 on S1928 uncouples the L-type Ca<sup>2+</sup> channel from the beta2 adrenergic receptor. *The EMBO journal* 35(12):1330-1345.
50. Cervantes D, Crosby C, & Xiang Y (2010) Arrestin orchestrates crosstalk between G protein-coupled receptors to modulate the spatiotemporal activation of ERK MAPK. *Circulation research* 106(1):79-88.
51. Chen Y, *et al.* (2008) NS21: re-defined and modified supplement B27 for neuronal cultures. *Journal of neuroscience methods* 171(2):239-247.
52. Beaudoin GM, 3rd, *et al.* (2012) Culturing pyramidal neurons from the early postnatal mouse hippocampus and cortex. *Nature protocols* 7(9):1741-1754.
53. Jiang M & Chen G (2006) High Ca<sup>2+</sup>-phosphate transfection efficiency in low-density neuronal cultures. *Nature protocols* 1(2):695-700.
54. Rizk A, *et al.* (2014) Segmentation and quantification of subcellular structures in fluorescence microscopy images using Squash. *Nature protocols* 9(3):586-596.
55. Wang SQ, Song LS, Lakatta EG, & Cheng H (2001) Ca<sup>2+</sup> signalling between single L-type Ca<sup>2+</sup> channels and ryanodine receptors in heart cells. *Nature* 410(6828):592-596.
56. Qian H, *et al.* (2017) Phosphorylation of Ser1928 mediates the enhanced activity of the L-type Ca<sup>2+</sup> channel Cav1.2 by the beta2-adrenergic receptor in neurons. *Science signaling* 10(463):eaaf9659.

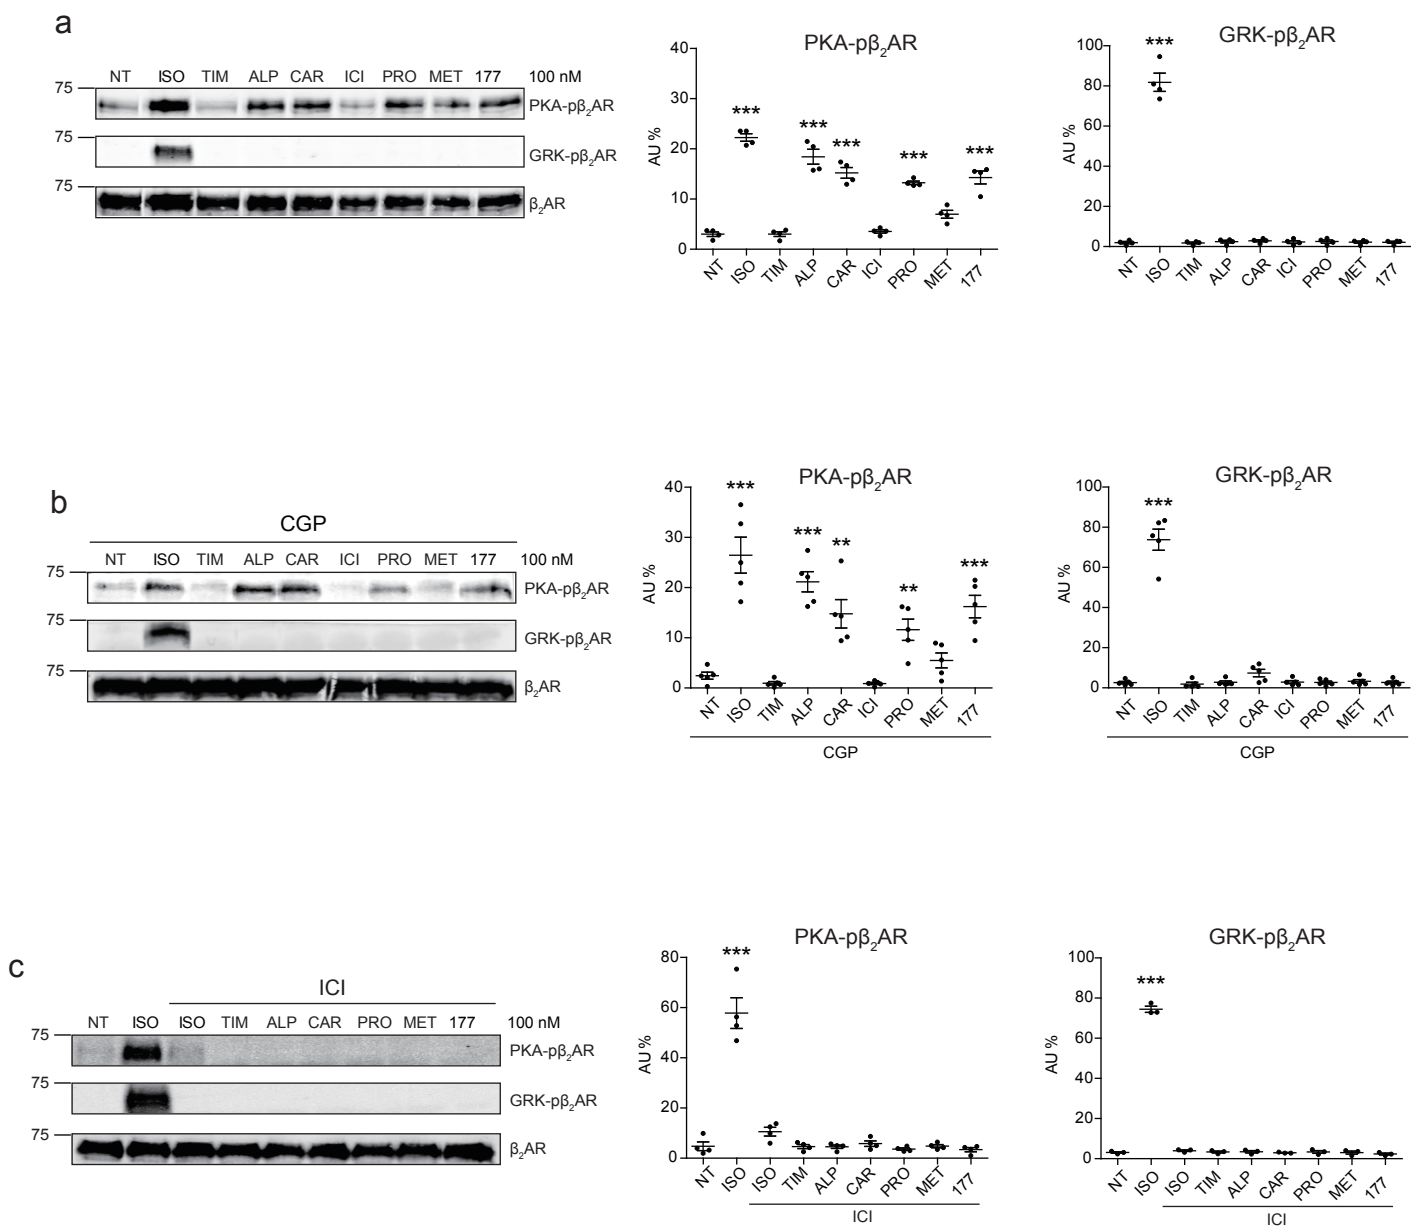

**Figure 1** Carvedilol and alprenolol selectively promote phosphorylation of  $\beta_2$ AR at PKA sites.

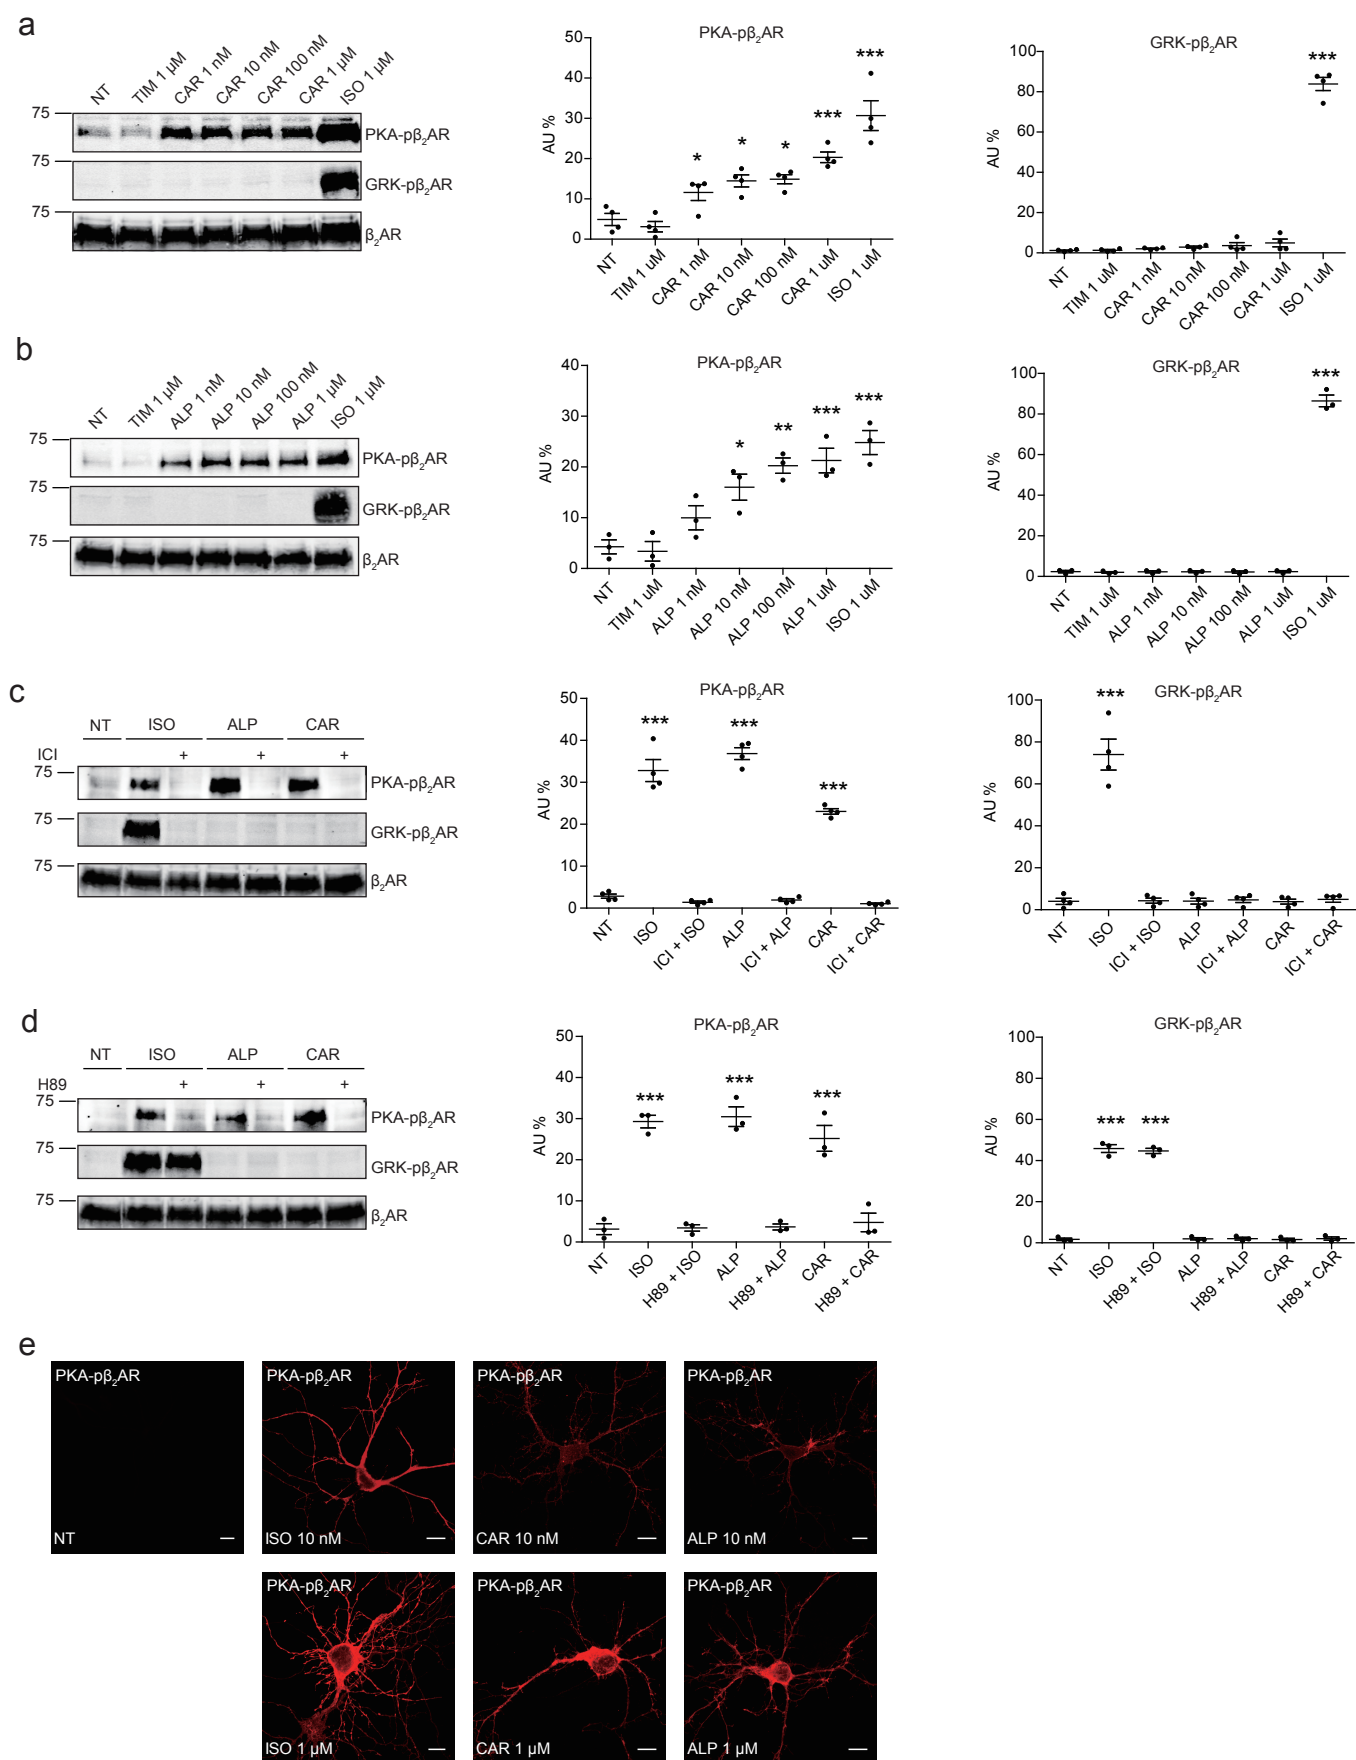

**Figure 2** Carvedilol and alprenolol induced concentration-dependent PKA phosphorylation of  $\beta_2$ AR in HEK293 and hippocampal neurons.

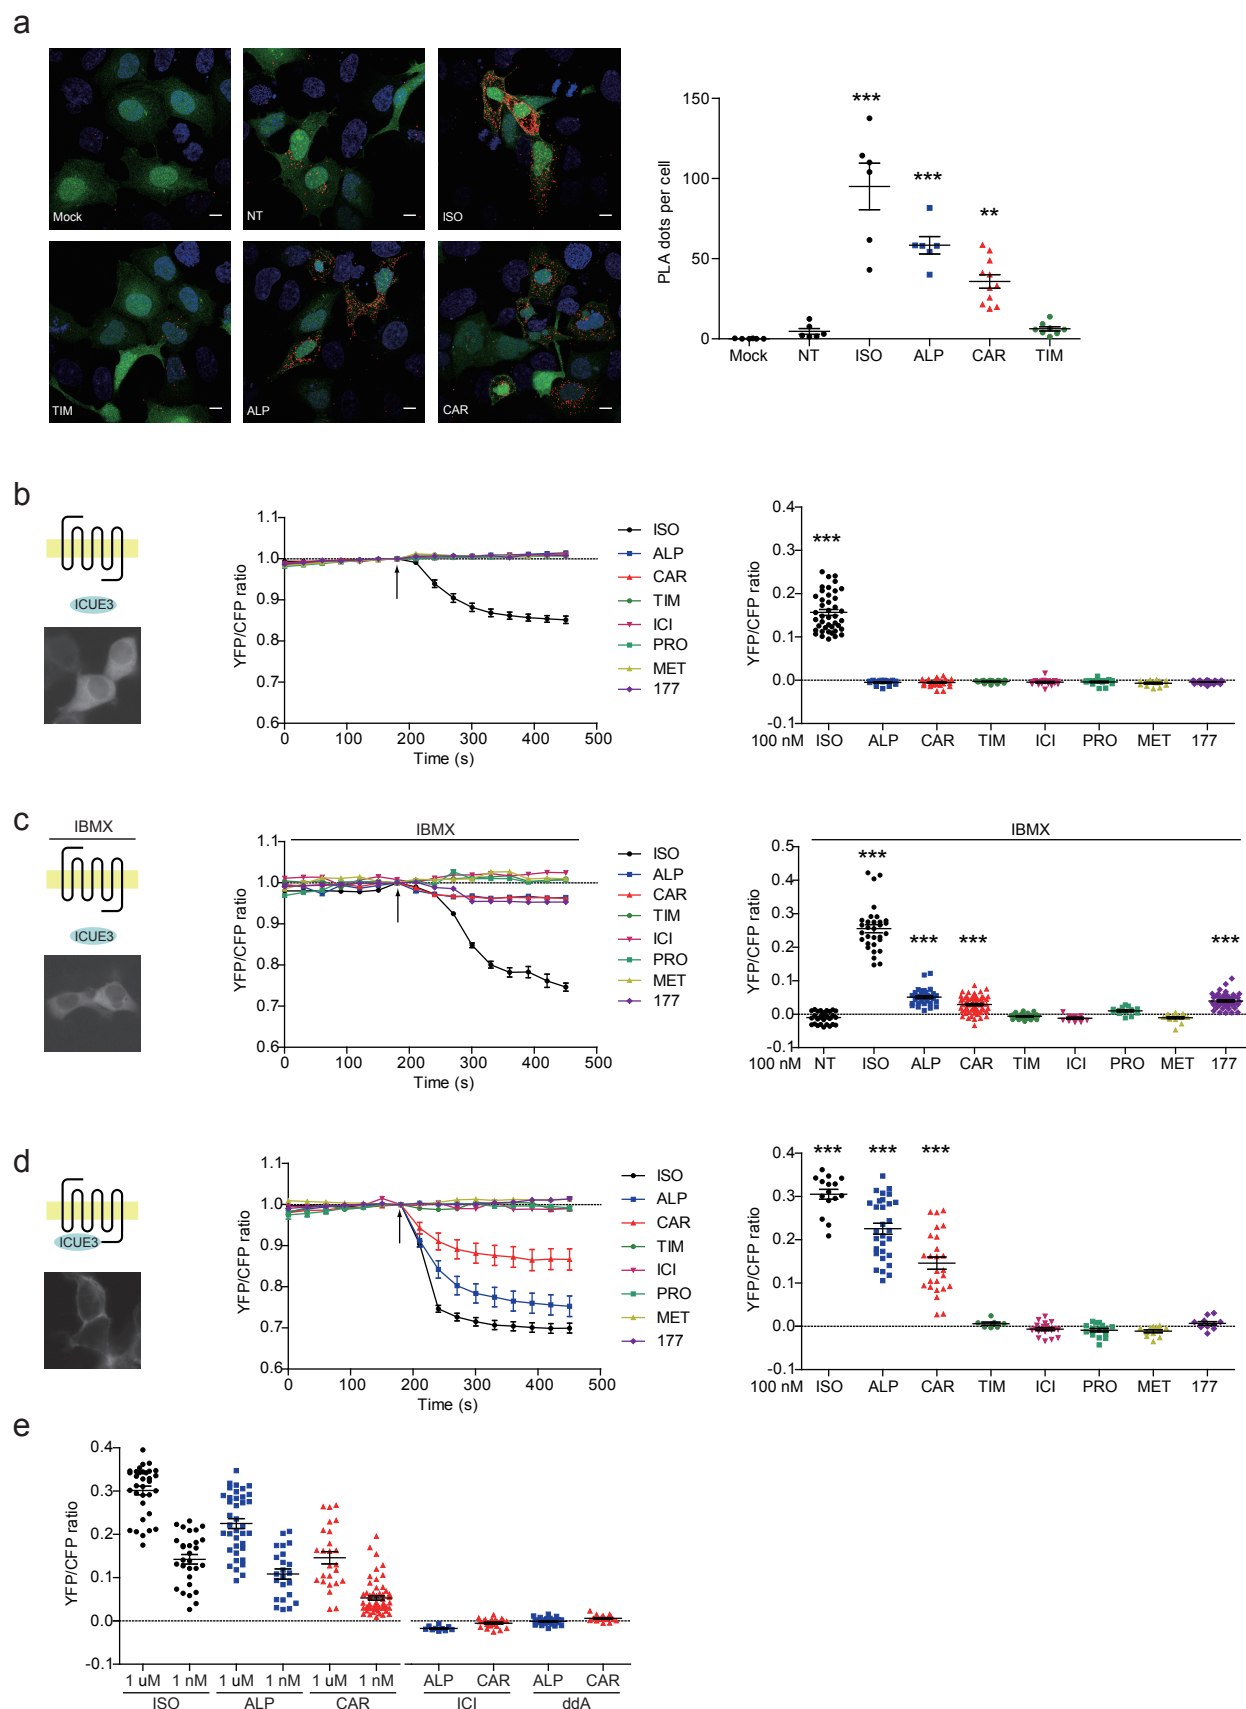

**Figure 3** Carvedilol and alprenolol promote G $\alpha$  recruitment to  $\beta_2$ AR and increase locally restricted cAMP signal.

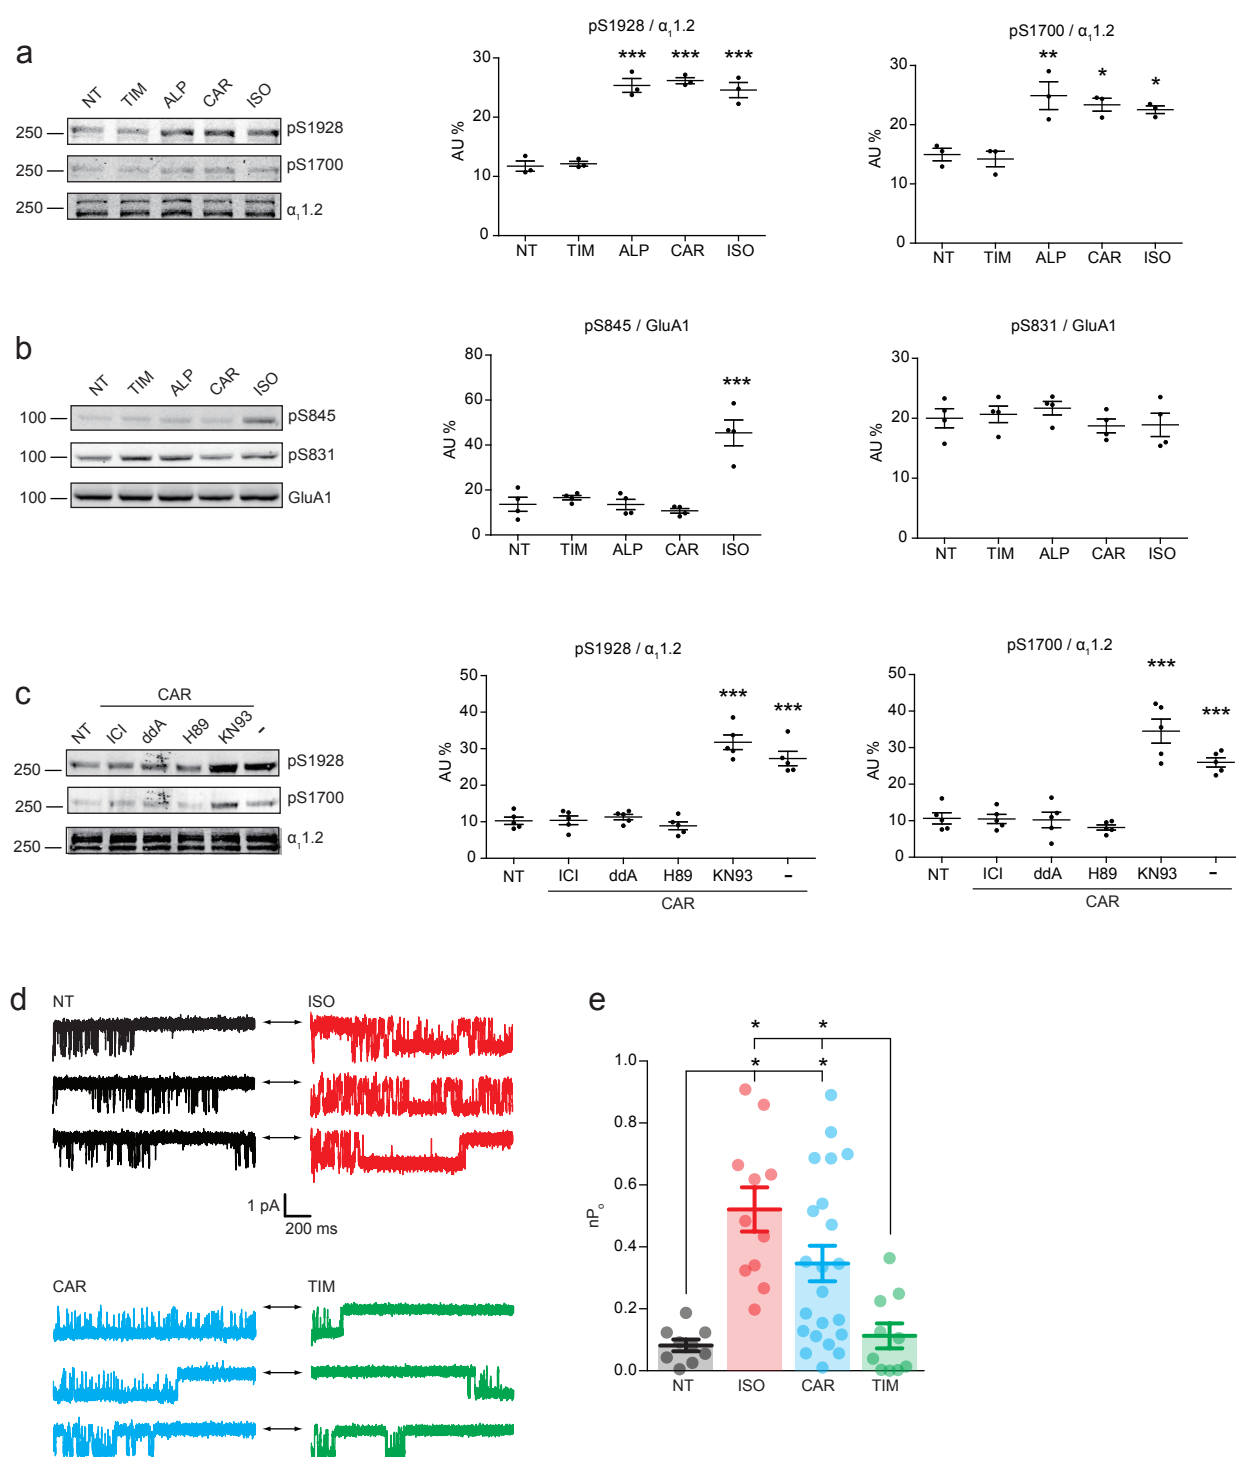

**Figure 4** Carvedilol promotes endogenous  $\beta_2$ AR-dependent PKA phosphorylation of LTCC  $\alpha_{1.2}$  and augment of channel activity in hippocampal neurons.



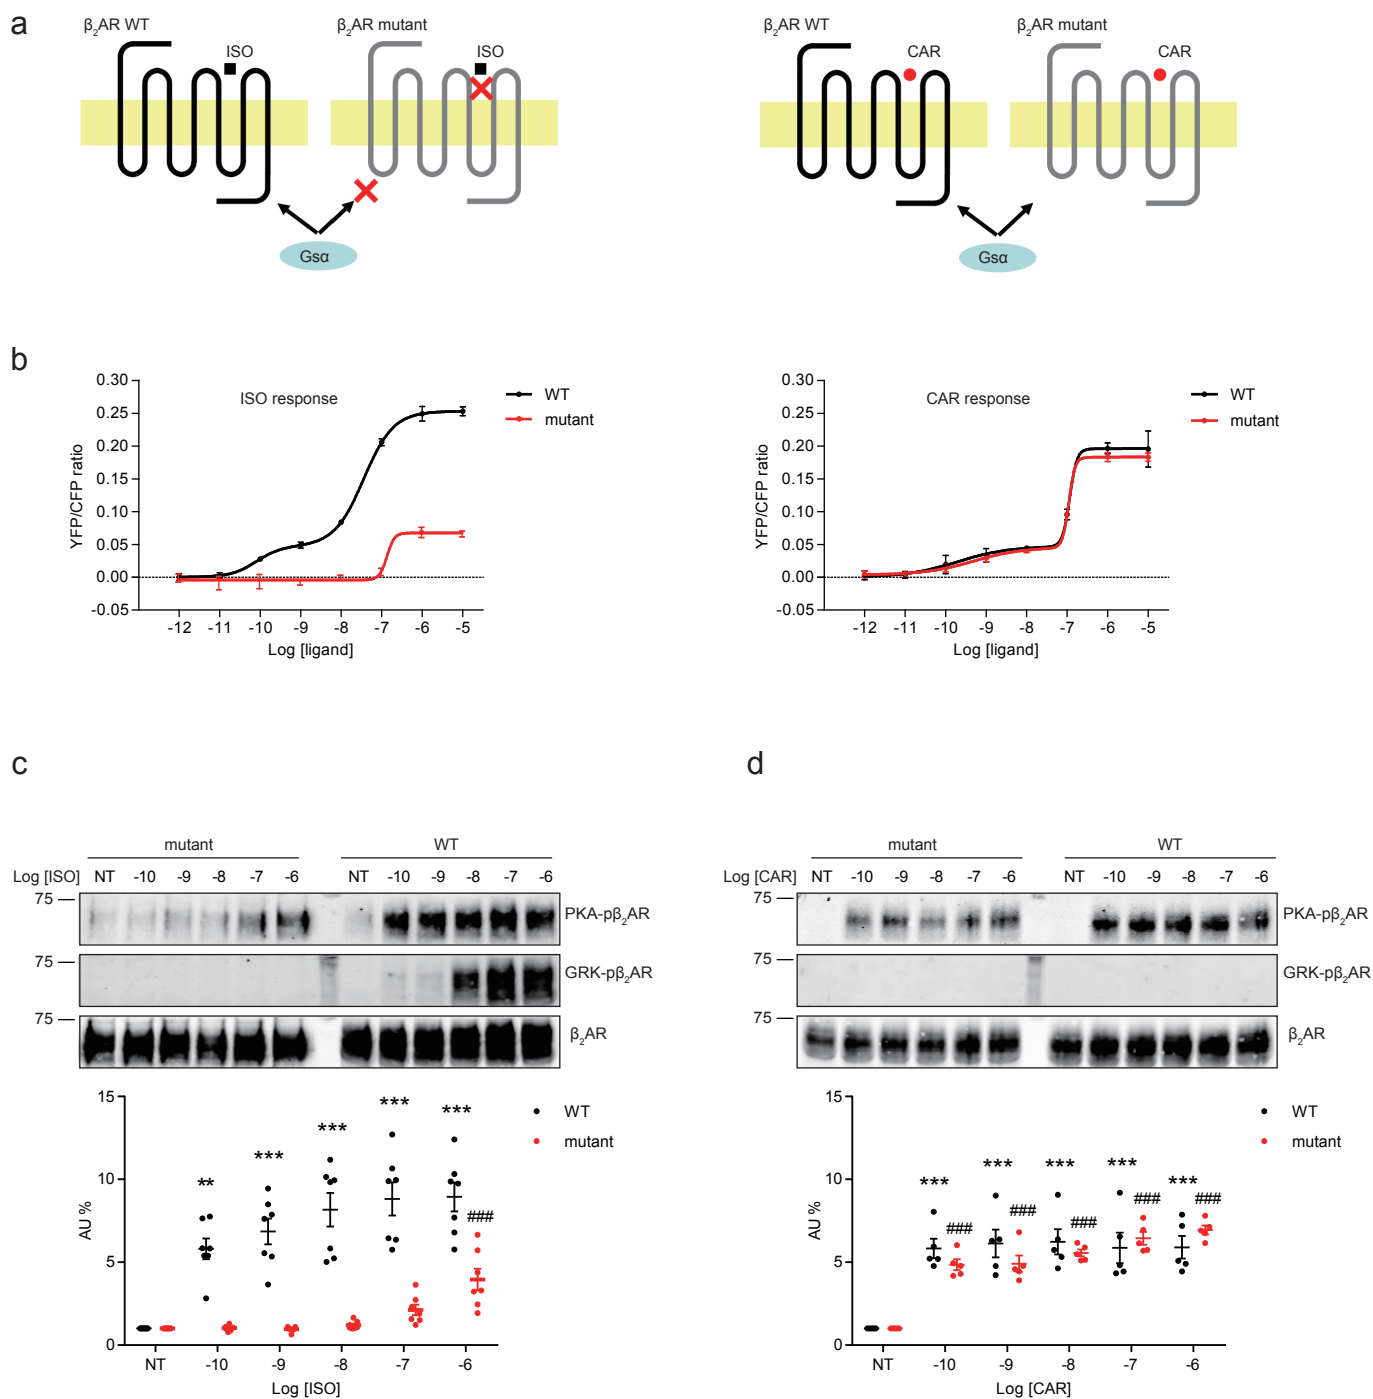

**Figure 5 A mutant  $\beta_2$ AR is selectively activated by carvedilol but not isoproterenol.**



a

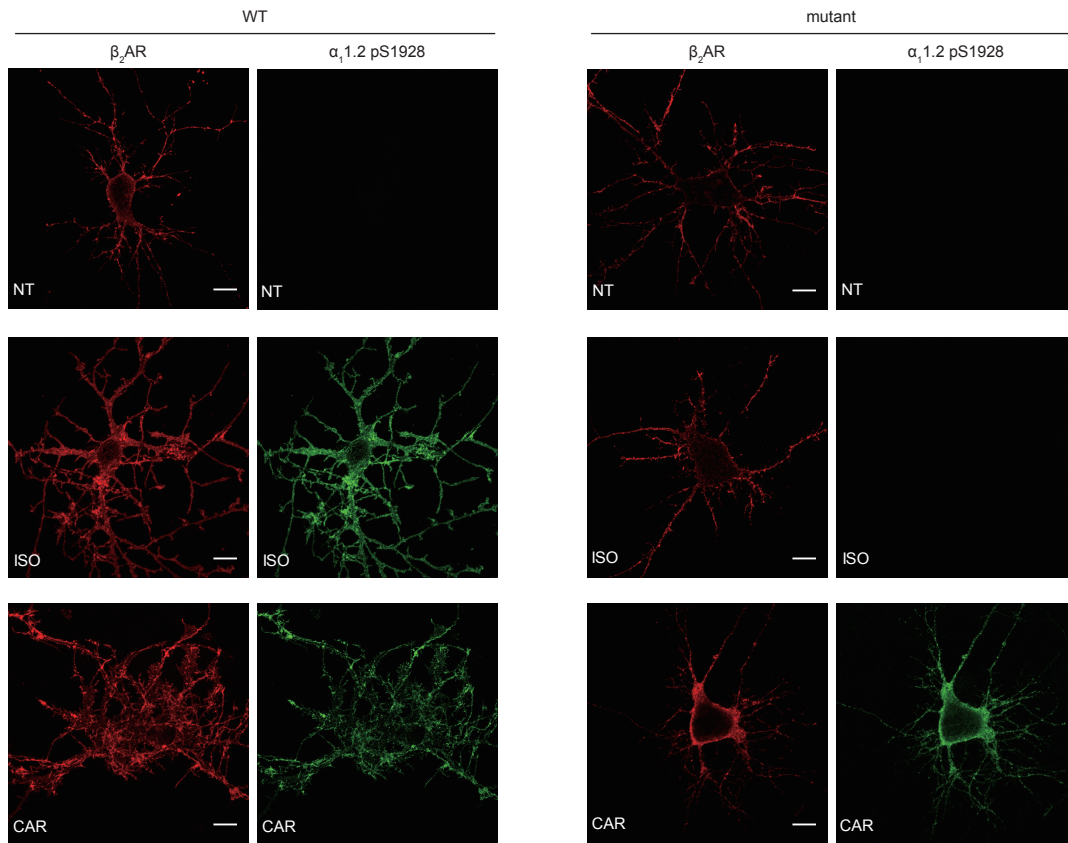

b

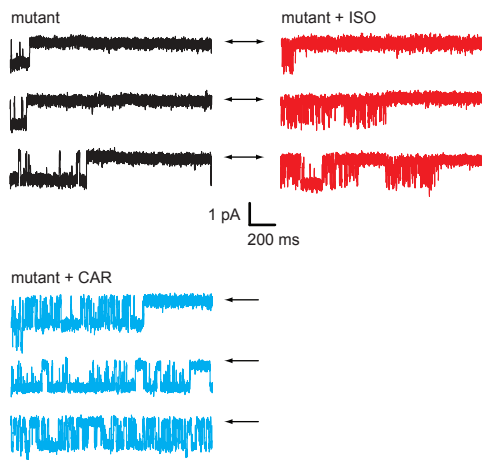

c

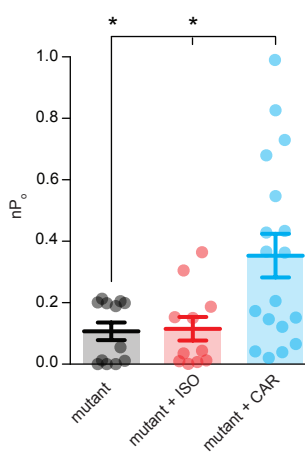

**Figure 6** Carvedilol selectively activates the mutant  $\beta_2$ AR and promotes LTCC activity in hippocampal neurons.
